# Supplementary material
Source: PubMed Central journal article supplement (PMC2883633)
Supplement: NIHMS190911-supplement-01.pdf [file NIHMS190911-supplement-01.pdf]

**Supplementary Table 1.** Effect of EM011 on cell cycle progression of prostate cancer cells

| Time (h) | PC-3               |                                |          |                   | LNCaP              |                                |          |                   | C4-2               |                                |         |                   | C4-2B              |                                |          |                   |
|----------|--------------------|--------------------------------|----------|-------------------|--------------------|--------------------------------|----------|-------------------|--------------------|--------------------------------|---------|-------------------|--------------------|--------------------------------|----------|-------------------|
|          | Sub-G <sub>1</sub> | G <sub>0</sub> /G <sub>1</sub> | S        | G <sub>2</sub> /M | Sub-G <sub>1</sub> | G <sub>0</sub> /G <sub>1</sub> | S        | G <sub>2</sub> /M | Sub-G <sub>1</sub> | G <sub>0</sub> /G <sub>1</sub> | S       | G <sub>2</sub> /M | Sub-G <sub>1</sub> | G <sub>0</sub> /G <sub>1</sub> | S        | G <sub>2</sub> /M |
| 0        | 1.3±0.03           | 62.8±3.2                       | 12.5±1.2 | 20.1±2.1          | 0.2±0.02           | 58.3±5.3                       | 14.4±1.8 | 20.2±3.6          | 0.2±0.01           | 59.8±4.9                       | 9.1±1.6 | 19.7±2.2          | 0.1±0.02           | 54.5±5.2                       | 17.6±3.2 | 20.3±1.2          |
| 24       | 39.1±3.4           | 32.7±5.6                       | 9.5±2.5  | 27.1±2.3          | 26±2.1             | 33.8±2.4                       | 8.8±2.1  | 25.9±4.4          | 28.5±2.5           | 33.9±4.8                       | 7.5±2.8 | 24.7±2.9          | 39.6±3.3           | 26.2±4.2                       | 10.6±1.5 | 24.4±3.4          |
| 48       | 58±4.5             | 18.3±4.6                       | 7.5±1.6  | 18.7±2.4          | 35.3±4.5           | 30.5±2.7                       | 8.3±1.4  | 21.7±3.2          | 37.1±3.2           | 31.8±3.3                       | 17±3.1  | 9.4±1.8           | 52.2±3.2           | 15.9±1.9                       | 11.1±2.4 | 21.4±3.9          |
| 72       | 72.5±5.1           | 10.3±2.8                       | 12.7±1.8 | 5.5±1.4           | 52.9±2.4           | 32.4±2.8                       | 4.8±1.2  | 7.2±1.6           | 55.1±3.5           | 27.5±5.5                       | 5.3±2.7 | 12.8±3.4          | 68.6±4.7           | 10.6±2.1                       | 7.4±2.6  | 7.7±1.5           |

Cells were treated with 25  $\mu$ M EM011 for the indicated time (h) before being stained with propidium iodide (PI) for cell cycle analysis. Values represent mean  $\pm$  SEM.
